# Supplementary material
Source: Springer Nature journal article supplement (https://www.springermedizin.de/resource/supplementary/12967_2010_756_MOESM1_ESM.pdf/9577444)

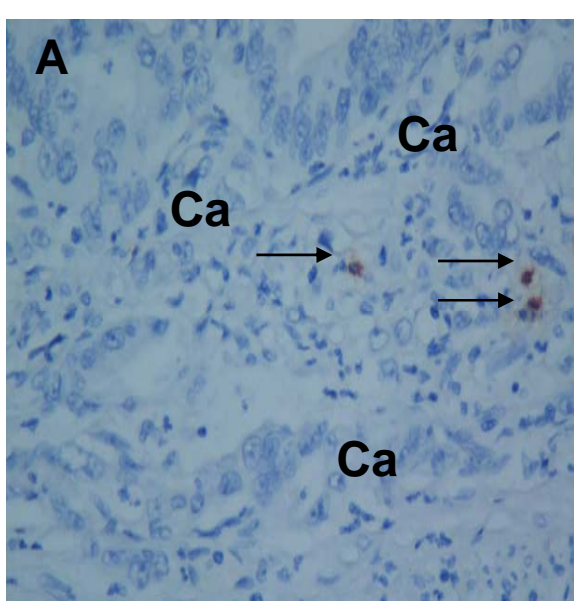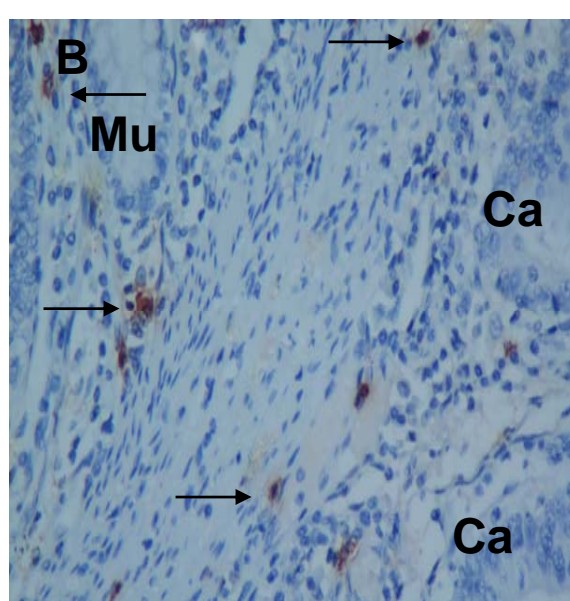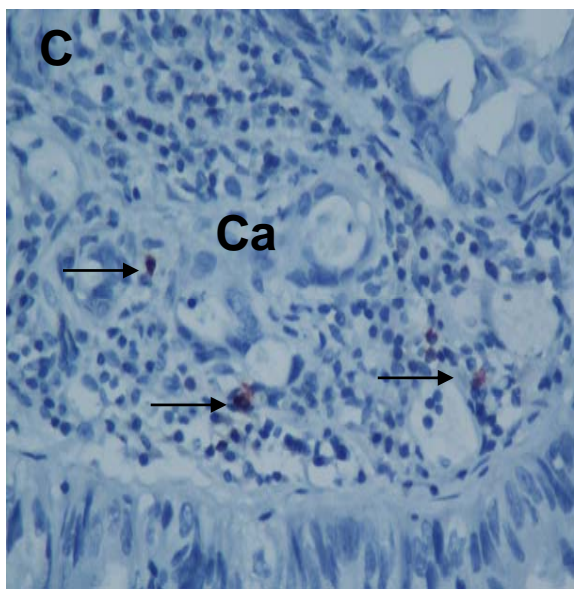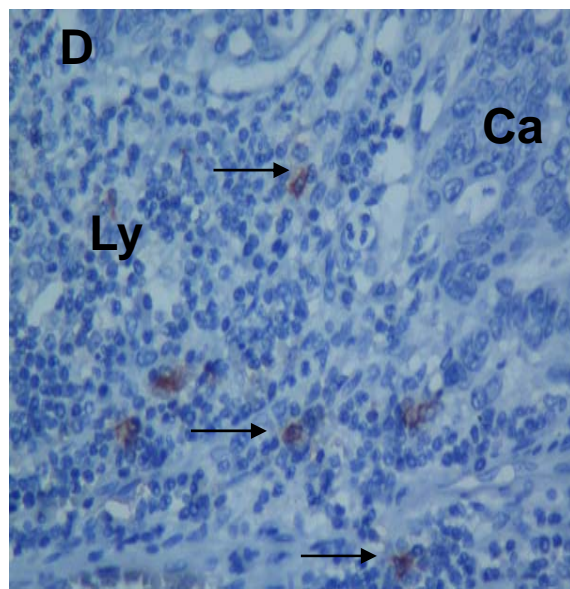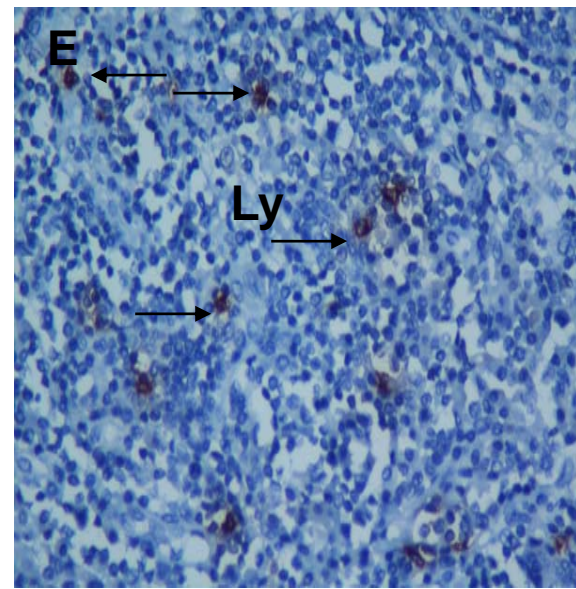

Supplement: MOESM1 [file 9577444]
